# Supplementary material
Source: Springer Nature journal article supplement (https://www.springermedizin.de/resource/supplementary/13063_2014_2247_MOESM7_ESM.pdf/9621732)
Supplement: MOESM7 [file 9621732]

Table 2: Number of trials recording adverse events by type of treatment

|                              | Chemotherapy | Endocrine therapy | Radiotherapy | Neoadjuvant/perioperative therapy | Other   | All      |
|------------------------------|--------------|-------------------|--------------|-----------------------------------|---------|----------|
| Cardiovascular               | 3 (38%)      | 4 (50%)           | 5 (71%)      | 0 (0%)                            | 2 (33%) | 14 (41%) |
| Neurological                 | 1 (13%)      | 2 (25%)           | 0 (0%)       | 0 (0%)                            | 2 (33%) | 5 (15%)  |
| Menopausal                   | 0 (0%)       | 3 (38%)           | 0 (0%)       | 0 (0%)                            | 0 (0%)  | 3 (9%)   |
| Fracture                     | 1 (13%)      | 4 (50%)           | 5 (71%)      | 0 (0%)                            | 1 (17%) | 11 (32%) |
| Other musculoskeletal        | 1 (13%)      | 4 (50%)           | 2 (29%)      | 0 (0%)                            | 0 (0%)  | 7 (21%)  |
| Psychiatric                  | 0 (0%)       | 2 (25%)           | 0 (0%)       | 0 (0%)                            | 0 (0%)  | 2 (6%)   |
| Gastrointestinal             | 0 (0%)       | 3 (38%)           | 0 (0%)       | 0 (0%)                            | 0 (0%)  | 3 (9%)   |
| Gynaecological               | 0 (0%)       | 4 (50%)           | 0 (0%)       | 0 (0%)                            | 0 (0%)  | 4 (12%)  |
| Other (free text)            | 6 (75%)      | 6 (75%)           | 5 (71%)      | 3 (60%)                           | 4 (67%) | 24 (71%) |
| Hospitalisations (free text) | 3 (38%)      | 2 (25%)           | 0 (0%)       | 0 (0%)                            | 2 (33%) | 7 (21%)  |

Highlighted fields indicate where  $\geq 50\%$  trials have requested details.
